# Supplementary material for: Ideal Cardiovascular Health and the Prevalence and Progression of Coronary Artery Calcification in Adults With and Without Type 1 Diabetes
Source: PubMed Central journal article supplement — Diabetes Care. 2014 Jan 11;37(2):521–8. doi: 10.2337/dc13-0997 (PMC3898750; doi:10.2337/dc13-0997), 2014-01-11
Supplement: supp_dc13-0997v130997_DC130997SupplementaryData.pdf [file supp_dc13-0997v130997_DC130997SupplementaryData.pdf]

SUPPLEMENTARY DATA

**Supplementary Table 1.** Baseline Characteristics of Subjects Based on Availability of CAC Progression Data

| Characteristic                                                                        | No CAC Progression Data (n=321) | CAC Progression Data (n=856) | <i>p</i> value* |
|---------------------------------------------------------------------------------------|---------------------------------|------------------------------|-----------------|
| Age at baseline, mean (SD)                                                            | 35.1 (9.2)                      | 39.2 (8.9)                   | <0.001          |
| Males, N (%)                                                                          | 147 (45.8)                      | 401 (46.9)                   | 0.747           |
| White, N (%)                                                                          | 284 (88.5)                      | 770 (90.4)                   | 0.336           |
| Hispanic, N (%)                                                                       | 17 (5.3)                        | 51 (6.0)                     | 0.637           |
| Diabetes, N (%)                                                                       | 148 (46.1)                      | 398 (46.5)                   | 0.905           |
| HbA <sub>1c</sub> %, mean (SD)                                                        | 6.7 (1.7)                       | 6.6 (1.5)                    | 0.356           |
| BMI (kg/m <sup>2</sup> ), mean (SD)                                                   | 26.1 (5.4)                      | 26.2 (4.5)                   | 0.858           |
| SBP (mmHg), mean (SD)                                                                 | 116 (15)                        | 116 (13)                     | 0.625           |
| DBP (mmHg), mean (SD)                                                                 | 79 (9)                          | 78 (9)                       | 0.355           |
| Total cholesterol (mg/dl), mean (SD)                                                  | 185 (40)                        | 184 (37)                     | 0.694           |
| Triglycerides (mg/dl), geometric mean (25 <sup>th</sup> -75 <sup>th</sup> percentile) | 99 (68-136)                     | 97 (68-131)                  | 0.593           |
| Presence of CAC at baseline, N (%)                                                    | 104 (32.4)                      | 264 (30.8)                   | 0.608           |

CAC: coronary artery calcification

\*p-value obtained from t-test for continuous data; chi-square for categorical data

SUPPLEMENTARY DATA

**Supplementary Table 2.** Comparison of Logistic Regression Model Fit for Continuous and Dichotomized ICH Variables

| Variable                  | Continuous   |           | ICH Metric   |           |
|---------------------------|--------------|-----------|--------------|-----------|
|                           | Wald p-value | Model AIC | Wald p-value | Model AIC |
| CAC Prevalence            |              |           |              |           |
| BMI (kg/m <sup>2</sup> )  | <0.001       | 1376.21   | <0.001       | 1389.28   |
| Physical Activity*        | 0.049        | 1461.52   | 0.218        | 1464.77   |
| Diet Score†               | 0.633        | 1466.11   | 0.252        | 1465.06   |
| Total Cholesterol (mg/dl) | <0.001       | 1447.11   | <0.001       | 1418.85   |
| Blood Pressure (BP)       |              | 1391.95   | <0.001       | 1396.93   |
| Systolic BP (mmHg)        | <0.001       |           |              |           |
| Diastolic BP (mmHg)       | 0.505        |           |              |           |
| HbA <sub>1c</sub> (%)     | <0.001       | 1419.55   | <0.001       | 1412.76   |
| CAC Progression           |              |           |              |           |
| BMI (kg/m <sup>2</sup> )  | <0.001       | 1079.26   | <0.001       | 1091.34   |
| Physical Activity*        | 0.321        | 1119.96   | 0.777        | 1121.23   |
| Diet Score†               | 0.088        | 1118.39   | 0.507        | 1120.88   |
| Total Cholesterol (mg/dl) | 0.556        | 1120.96   | <0.001       | 1108.53   |
| Blood Pressure (BP)       |              | 1041.31   | <0.001       | 1046.34   |
| Systolic BP (mmHg)        | <0.001       |           |              |           |
| Diastolic BP (mmHg)       | 0.985        |           |              |           |
| HbA <sub>1c</sub> (%)     | <0.001       | 1079.57   | <0.001       | 1076.97   |

\*Minutes per week of moderate or vigorous-intensity exercise

†Number of components of healthy diet met, scaled to 2000 kcal/day

SUPPLEMENTARY DATA

**Supplementary Table 3.** Multiple\* Logistic Regression of Ideal Cardiovascular Health on Prevalence and Progression of Coronary Artery Calcification (CAC) by Diabetes Status

| Variable                                   | Type 1 Diabetes (N=546)      |                               | No Diabetes (N=631)          |                               |
|--------------------------------------------|------------------------------|-------------------------------|------------------------------|-------------------------------|
|                                            | Prevalence of CACOR (95% CI) | Progression of CACOR (95% CI) | Prevalence of CACOR (95% CI) | Progression of CACOR (95% CI) |
| Model 1: Ideal Health Metrics <sup>†</sup> |                              |                               |                              |                               |
| Smoking                                    | 0.73 (0.46, 1.16)            | 0.50 (0.27, 0.90)             | 0.87 (0.56, 1.37)            | 0.48 (0.29, 0.82)             |
| BMI                                        | 0.37 (0.23, 0.59)            | 0.68 (0.39, 1.19)             | 0.42 (0.26, 0.68)            | 0.68 (0.41, 1.13)             |
| Physical activity                          | 0.81 (0.38, 1.74)            | 1.46 (0.62, 3.43)             | 0.95 (0.46, 1.98)            | 1.34 (0.60, 2.70)             |
| Diet                                       | 3.08 (0.34, 30.20)           | 0.08 (0.01, 1.14)             | 1.06 (0.11, 9.85)            | 0.10 (0.004, 2.39)            |
| Total cholesterol                          | 0.80 (0.50, 1.28)            | 1.27 (0.69, 2.33)             | 0.71 (0.46, 1.10)            | 1.20 (0.69, 2.09)             |
| Blood pressure                             | 0.97 (0.58, 1.64)            | 0.47 (0.26, 0.87)             | 0.67 (0.41, 1.09)            | 0.44 (0.26, 0.77)             |
| HbA <sub>1c</sub> <sup>‡</sup>             | 0.57 (0.25, 1.28)            | 1.80 (0.73, 4.46)             | 0.96 (0.60, 1.56)            | 1.21 (0.11, 13.15)            |
|                                            |                              |                               |                              |                               |
| Model 2:                                   |                              |                               |                              |                               |
| Number of Ideal Health Factors             | 0.75 (0.55, 1.02)            | 0.78 (0.55, 1.11)             | 0.74 (0.58, 0.95)            | 0.74 (0.55, 0.99)             |
| Number of Ideal Health Behaviors           | 0.63 (0.48, 0.83)            | 0.67 (0.48, 0.93)             | 0.68 (0.51, 0.91)            | 0.96 (0.69, 1.33)             |
|                                            |                              |                               |                              |                               |
| Model 3:                                   |                              |                               |                              |                               |
| Number of Ideal Health Metrics             | 0.68 (0.56, 0.83)            | 0.72 (0.57, 0.90)             | 0.71 (0.60, 0.86)            | 0.83 (0.67, 1.02)             |

\*Adjusted for age, log triglycerides, and sex; additionally adjusted for baseline CAC in all progression models and for duration of diabetes and log albumin excretion rate in the diabetes-specific models

<sup>†</sup>Factors were included in a single model to test the independent effect of each

<sup>‡</sup>Due to small numbers of ideal HbA<sub>1c</sub> in those with diabetes, the ideal and intermediate categories were combined

SUPPLEMENTARY DATA

**Supplementary Table 4.** Multiple\* Logistic Regression of Intermediate and Poor Cardiovascular Health on Prevalence and Progression of Coronary Artery Calcification

| Variable                                            | Prevalence of CAC | Progression of CAC |
|-----------------------------------------------------|-------------------|--------------------|
|                                                     | OR (95% CI)       | OR (95% CI)        |
| Model 1: Cardiovascular Health Metrics <sup>†</sup> |                   |                    |
| Smoking                                             |                   |                    |
| Intermediate vs. Ideal                              | 1.09 (0.75, 1.57) | 0.88 (0.57, 1.37)  |
| Poor vs. Ideal                                      | 1.42 (0.88, 2.29) | 1.62 (0.91, 2.88)  |
| BMI                                                 |                   |                    |
| Intermediate vs. Ideal                              | 1.77 (1.24, 2.51) | 1.36 (0.90, 2.04)  |
| Poor vs. Ideal                                      | 5.74 (3.71, 8.90) | 2.97 (1.78, 4.95)  |
| Physical activity                                   |                   |                    |
| Intermediate vs. Ideal                              | 1.18 (0.67, 2.07) | 0.92 (0.49, 1.74)  |
| Poor vs. Ideal                                      | 1.05 (0.62, 1.79) | 1.00 (0.55, 1.82)  |
| Diet                                                |                   |                    |
| Intermediate vs. Ideal                              | 0.61 (0.15, 2.52) | 1.46 (0.23, 9.27)  |
| Poor vs. Ideal                                      | 0.52 (0.13, 2.15) | 0.90 (0.14, 5.70)  |
| Total cholesterol                                   |                   |                    |
| Intermediate vs. Ideal                              | 1.43 (1.03, 1.99) | 1.08 (0.73, 1.60)  |
| Poor vs. Ideal                                      | 1.20 (0.67, 2.14) | 0.48 (0.23, 1.00)  |
| Blood pressure                                      |                   |                    |
| Intermediate vs. Ideal                              | 1.25 (0.88, 1.78) | 1.65 (1.10, 2.48)  |
| Poor vs. Ideal                                      | 1.12 (0.67, 1.89) | 4.39 (2.38, 8.09)  |
| HbA <sub>1c</sub>                                   |                   |                    |
| Intermediate vs. Ideal                              | 0.93 (0.58, 1.50) | 0.97 (0.57, 1.66)  |
| Poor vs. Ideal                                      | 1.90 (0.85, 4.26) | 0.75 (0.31, 1.80)  |
| Model 2:                                            |                   |                    |
| Health Factors Score <sup>‡</sup>                   | 0.82 (0.71, 0.95) | 0.80 (0.67, 0.95)  |
| Health Behaviors Score <sup>‡</sup>                 | 0.79 (0.71, 0.88) | 0.88 (0.78, 1.00)  |
| Model 3:                                            |                   |                    |
| Cardiovascular Health Score <sup>‡</sup>            | 0.80 (0.74, 0.87) | 0.85 (0.78, 0.93)  |

\*Adjusted for age, log triglycerides, sex, and diabetes status; additionally adjusted for baseline CAC in progression models

<sup>†</sup>Factors were included in a single model to test the independent effect of each

<sup>‡</sup>Values were assigned for each metric (0 for poor, 1 for intermediate, 2 for ideal) and summed across health factors (cholesterol, blood pressure, HbA<sub>1c</sub>), health behaviors (smoking, BMI, physical activity, diet), and across all metrics to arrive at a summary score for ideal, intermediate, and poor cardiovascular health.
